# Supplementary material for: A robust screening method for dietary agents that activate tumour-suppressor microRNAs
Source: PubMed Central journal article supplement (PMC4589759; doi:10.1038/srep14697), 2015-10-01
Supplement: srep14697-s1.pdf [file srep14697-s1.pdf]

## Supplementary Information

### **A robust screening method for dietary agents that activate tumour-suppressor microRNAs**

**Keitaro Hagiwara,<sup>1,2</sup> Luc Gailhouste,<sup>1</sup> Ken Yasukawa,<sup>1,3</sup> Nobuyoshi Kosaka,<sup>1</sup>  
Takahiro Ochiya<sup>1\*</sup>**

<sup>1</sup> Division of Molecular and Cellular Medicine, National Cancer Center Research Institute, 5-1-1, Tsukiji, Chuo-ku, Tokyo 104-0045, Japan,

<sup>2</sup> Department of Biological Sciences, Tokyo Institute of Technology, 4259 Nagatsuta-cho, Midori-ku, Yokohama 226-8501, Japan.

<sup>3</sup> Integrative Bioscience and Biomedical Engineering, Graduate School of Science and Engineering, Waseda University, 2-2 Wakamatsu, Shinjuku, Tokyo 162-8480, Japan

\*Corresponding author

#### **Contents:**

- 1. Supplementary Figure S1**
- 2. Supplementary Table S1**

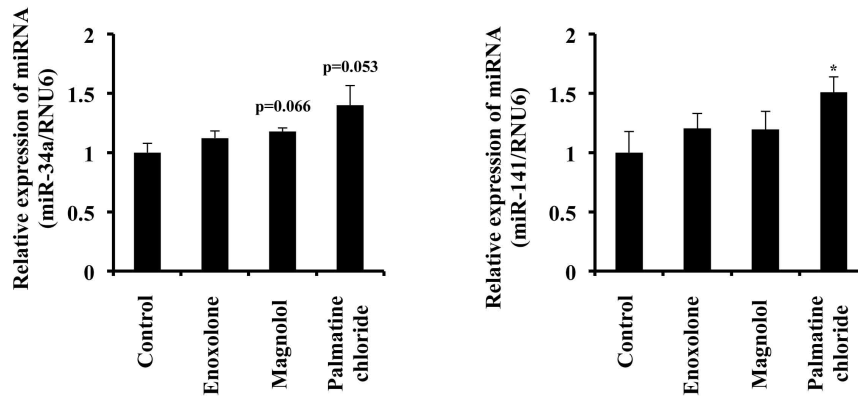

**Supplementary Figure S1 - Expression of miR-34a and miR-141 tumour-suppressor miRNAs following natural product treatment.**

MCF7 cells were grown and treated with enoxolone, magnolol or palmatine chloride (10  $\mu$ M), or DMSO (Control). After 2 days of culture, cell extracts were subjected to qRT-PCR. The values on the *y-axis* are depicted relative to the miRNA expression of miR-34a and miR-141. Cells treated with DMSO (Control) were used as controls, and their values were defined as 1.0. All data are shown as the mean  $\pm$  S.E. \* $P$ <0.05.

**Supplementary Table S1 - miR-200c reporter activity in response to natural product treatment in MCF7 cells. A library containing 139 well-clarified natural substances was utilised.**

| Natural products             | Firefly luciferase activity |
|------------------------------|-----------------------------|
| Capsaicin                    | 0.84±0.07                   |
| (-)-Epigallocatechin gallate | 1.00±0.07                   |
| (-)-Huperzine A              | 0.86±0.04                   |
| (+)-Usniacin                 | 0.32±0.05                   |
| 3-Indolebutyricacid          | 0.89±0.08                   |
| 4-Methylumbelliferone        | 0.83±0.10                   |
| Aesculin                     | 0.80±0.05                   |
| Aloe-emodin                  | 1.39±0.18                   |
| Amygdalin                    | 0.28±0.03                   |
| Andrographolide              | 1.02±0.12                   |
| Apigenin                     | 5.52±1.37                   |
| Arbutin                      | 0.81±0.05                   |
| Asiatic acid                 | 0.90±0.01                   |
| Aucubin                      | 0.96±0.07                   |
| Baicalein                    | 2.44±0.34                   |
| Baicalin                     | 0.94±0.15                   |
| Bergenin                     | 1.04±0.17                   |
| Berberine Hydrochloride      | 0.35±0.06                   |
| β-Sitosterol                 | 1.20±0.09                   |
| Bilobalide                   | 1.26±0.19                   |
| Caffeic acid                 | 0.90±0.07                   |
| Chlorogenic acid             | 1.04±0.08                   |
| Chrysin                      | 7.44±0.44                   |
| Cinchonidine                 | 0.98±0.03                   |
| Colchicine                   | 0.09±0.01                   |

|                            |           |
|----------------------------|-----------|
| Cytisine                   | 1.04±0.19 |
| Daidzin                    | 6.40±1.74 |
| Dihydroartemisinin         | 0.53±0.10 |
| Diosgenin                  | 1.32±0.31 |
| Diosmin                    | 0.78±0.03 |
| DL-Carnitine hydrochloride | 0.99±0.02 |
| Ecdysone                   | 1.32±0.01 |
| Emodin                     | 2.64±0.11 |
| Enoxolone                  | 0.75±0.04 |
| Ergosterol                 | 0.80±0.04 |
| Fisetin                    | 1.53±0.27 |
| Formononetin               | 5.38±1.51 |
| Fumalic acid               | 1.02±0.10 |
| Genistin                   | 4.21±0.61 |
| Glycyrrhizic acid          | 1.06±0.05 |
| Gramine                    | 1.05±0.04 |
| Gynostemma Extract         | 1.25±0.04 |
| Hesperetin                 | 2.02±0.21 |
| Hesperidin                 | 0.90±0.03 |
| Honokiol                   | 1.04±0.09 |
| Hyodeoxycholic acid        | 1.08±0.15 |
| Icariin                    | 1.02±0.22 |
| Indole-3-carbinol          | 0.99±0.14 |
| Kaempferol                 | 2.72±0.41 |
| Kinetin                    | 0.82±0.06 |
| L(+)-Rhamnose Monohydrate  | 1.14±0.08 |
| Limonin                    | 1.09±0.11 |
| Luteolin                   | 3.04±0.20 |
| Magnolol                   | 0.44±0.01 |
| Matrine                    | 0.83±0.09 |

|                                  |           |
|----------------------------------|-----------|
| Methyl-Hesperidin                | 0.95±0.08 |
| Morin hydrate                    | 1.69±0.22 |
| Myricetin                        | 1.35±0.28 |
| Myricitrin                       | 1.32±0.22 |
| Nalidixic acid                   | 0.97±0.08 |
| Naringin                         | 1.20±0.17 |
| Neohesperidin<br>dihydrochalcone | 1.11±0.06 |
| Nobiletin                        | 0.87±0.08 |
| Oleanolic acid                   | 1.06±0.20 |
| Oridonin                         | 1.27±0.30 |
| Orotic acid                      | 1.34±0.22 |
| Osthole                          | 1.17±0.12 |
| Oxymatrine                       | 1.58±0.25 |
| Paeonol                          | 1.07±0.14 |
| Parthenolide                     | 1.03±0.01 |
| Phloretin                        | 1.29±0.08 |
| Phlorizin                        | 1.20±0.06 |
| Piperine                         | 1.92±0.09 |
| Puerarin                         | 0.86±0.07 |
| Quercetin dihydrate              | 1.40±0.14 |
| Rutaecarpine                     | 3.13±0.67 |
| Rutin                            | 1.08±0.13 |
| Salicin                          | 1.27±0.27 |
| Sclareol                         | 0.86±0.11 |
| Sclareolide                      | 0.72±0.08 |
| Shikimic acid                    | 0.87±0.13 |
| Silibinin                        | 0.94±0.13 |
| Silymarin                        | 0.90±0.17 |
| Sinomenine                       | 0.96±0.10 |
| Stigmasterol                     | 1.06±0.25 |
| Synephrine                       | 1.10±0.21 |

|                                       |             |
|---------------------------------------|-------------|
| Tangeretin                            | 1.21±0.33   |
| Tanshinone I                          | 3.08±0.21   |
| Taxifolin                             | 0.92±0.12   |
| Theobromine                           | 0.83±0.11   |
| Tetrahydropapaverine<br>hydrochloride | 0.73±0.13   |
| Troloxerutin                          | 0.98±0.18   |
| Ursolic acid                          | 0.87±0.14   |
| Vanillylacetone                       | 1.17±0.26   |
| Yohimbine<br>hydrochloride            | 1.44±0.25   |
| 5-hydroxytryptophan                   | 1.29±0.26   |
| Aloin                                 | 1.70±0.15   |
| Ammonium<br>Glycyrrhizinate           | 1.60±0.54   |
| Biochanin A                           | 4.97±0.69   |
| Butylscopolamine<br>bromide           | 0.97±0.18   |
| Gastrodin                             | 0.97±0.13   |
| ATP                                   | 0.89±0.16   |
| Hordenine                             | 0.92±0.06   |
| Indirubin                             | 1.11 ± 0.17 |
| Lappaconite<br>Hydrobromide           | 1.03±0.24   |
| L-carnitine                           | 1.13±0.24   |
| Naringin<br>Dihydrochalcone           | 1.25±0.32   |
| Polydatin                             | 9.52±2.19   |
| Quercetin                             | 1.99±0.46   |
| Sesamin                               | 0.51±0.08   |
| Sorbitol                              | 0.91±0.17   |
| Rheochrysidin                         | 1.01±0.14   |

|                     |           |
|---------------------|-----------|
| Salidroside         | 0.83±0.14 |
| Palmitine chloreide | 0.34±0.06 |
| Coenzyme Q10        | 0.92±0.19 |
| Dihydromyricetin    | 0.98±0.21 |
| Rhein               | 1.33±0.21 |
| Sodium Danshensu    | 1.55±0.31 |
| Cyclovirobuxin D    | 1.45±0.44 |
| Tetrandrine         | 0.62±0.14 |
| D-Mannitol          | 0.71±0.07 |
| Isoliquirtigenin    | 1.50±0.23 |
| Sophocarpine        | 0.90±0.15 |
| Chrysophanic acid   | 1.55±0.36 |
| Curcumol            | 0.82±0.10 |
| Neohesperidin       | 0.95±0.14 |
| Xanthone            | 1.55±0.36 |
| Diosmetin           | 2.66±0.80 |
| Hematoxylin         | 1.34±0.37 |
| Naringenin          | 2.90±0.50 |
